# Supplementary material for: Isotope Calculation Gadgets: A Series of Software for Isotope-Tracing Experiments in Garuda Platform
Source: MDPI journal article supplement (doi:10.3390/metabo12070646), 2022-07-14
Supplement: s1 [file s1]

## Supplementary information

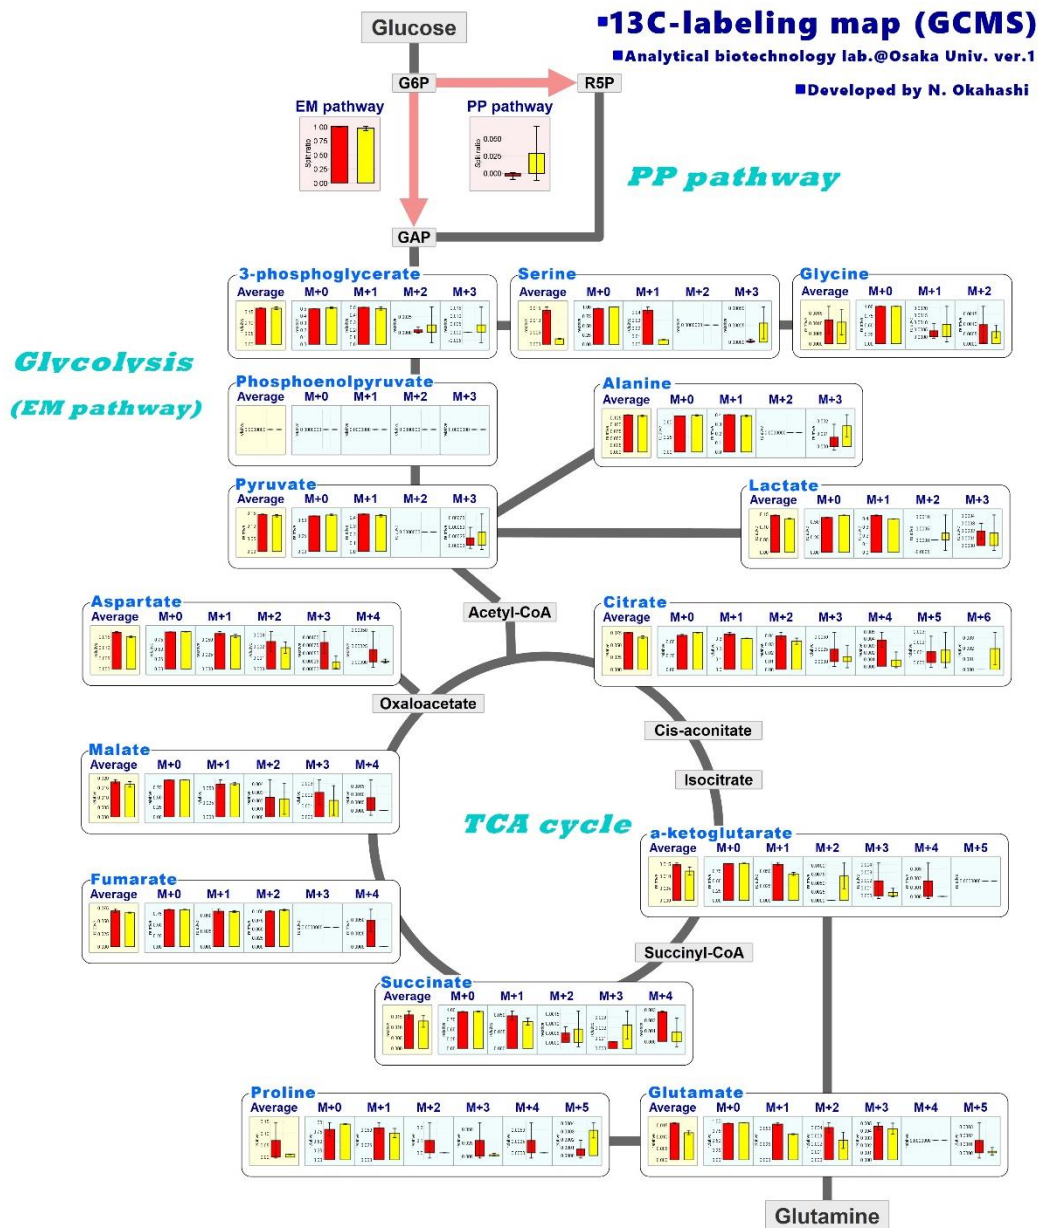

**Figure S1. Labeling data visualization on a metabolic map ([1-<sup>13</sup>C]glucose and unlabeled glutamine).**

HCT116 (red) and WiDr (yellow) were cultured in medium containing [1-<sup>13</sup>C]glucose and unlabeled glutamine. Blue, yellow, and pink boxes represent mass isotopologue distribution, fractional labeling, and split ratio, respectively.

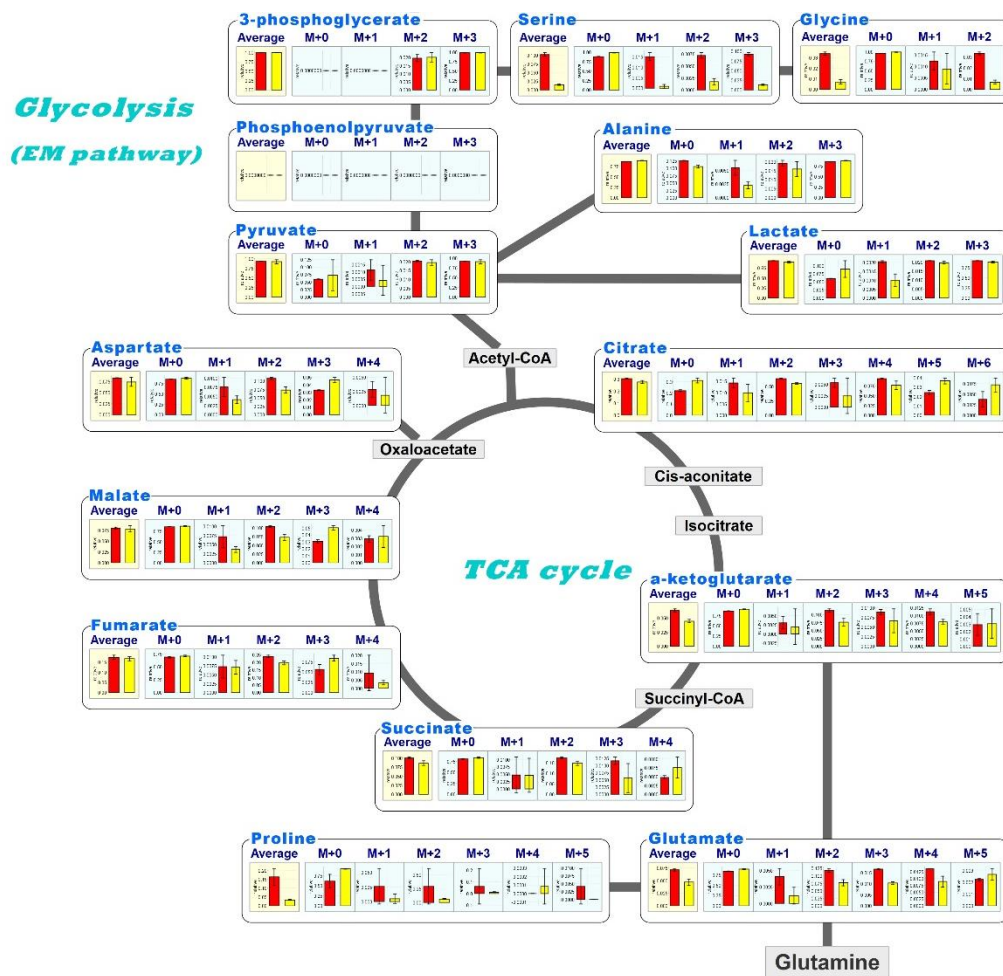

**Figure S2. Labeling data visualization on a metabolic map ([U-<sup>13</sup>C]glucose and unlabeled glutamine).**

HCT116 (red) and WiDr (yellow) were cultured in medium containing [U-<sup>13</sup>C]glucose and unlabeled glutamine. Blue and yellow boxes represent mass isotopologue distribution and fractional labeling, respectively.

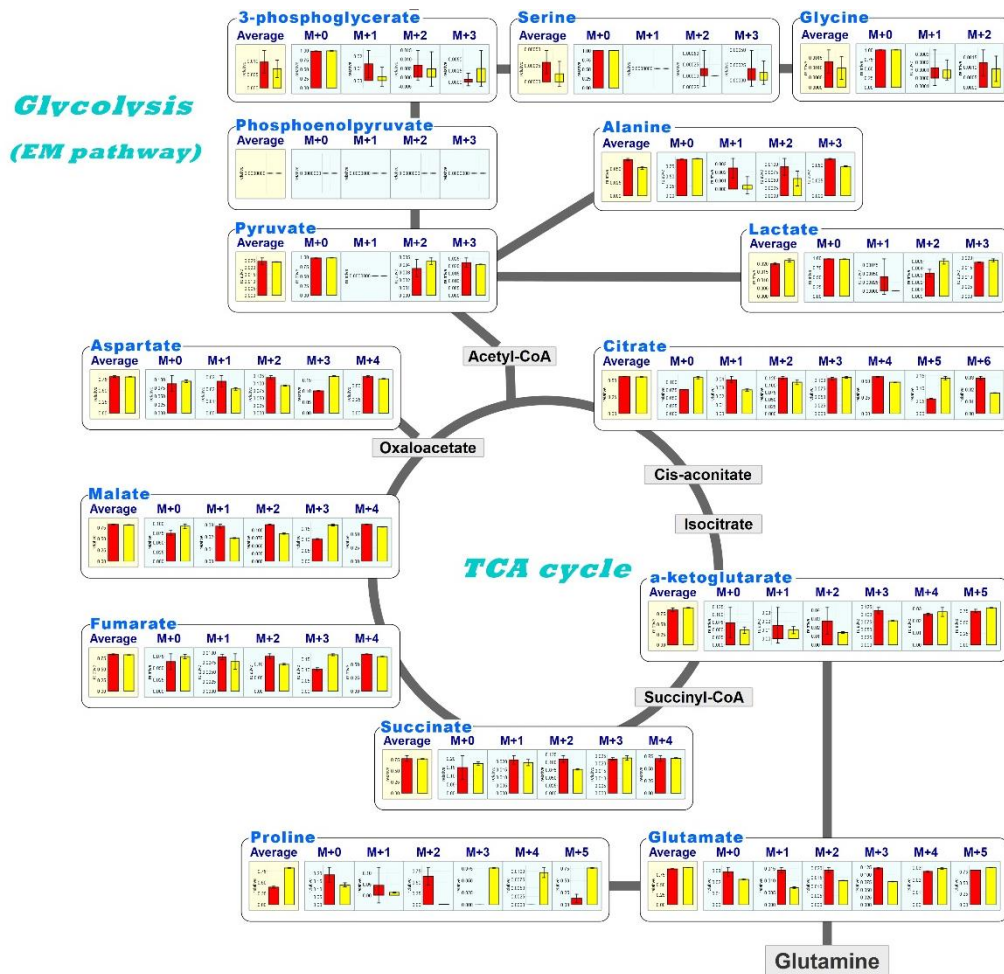

**Figure S3. Labeling data visualization on a metabolic map (unlabeled glucose and [U-<sup>13</sup>C]glutamine).**

HCT116 (red) and WiDr (yellow) were cultured in medium containing unlabeled glucose and [U-<sup>13</sup>C]glutamine. Blue and yellow boxes represent mass isotopologue distribution and fractional labeling, respectively.

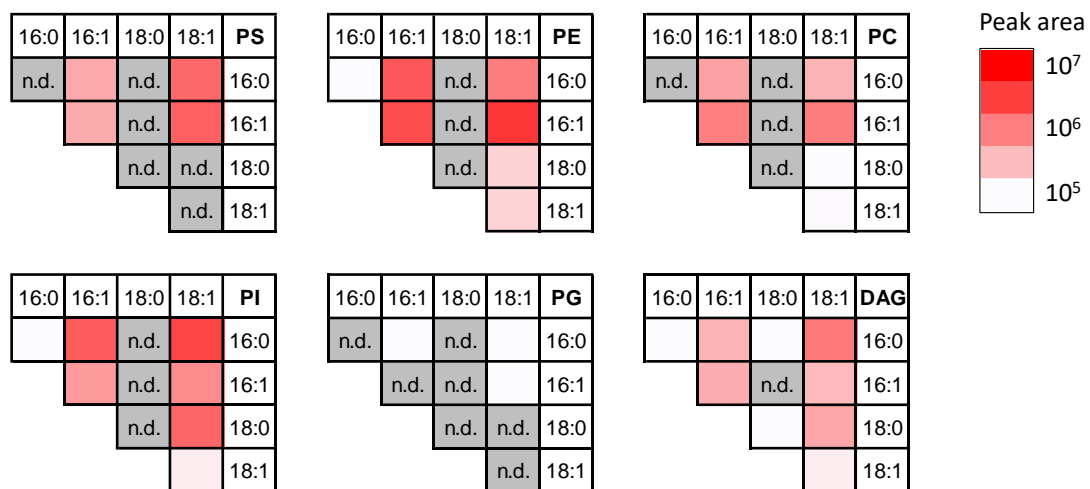

**Figure S4. Heatmaps of glycerolipid abundance.**

Peak areas of glycerolipids obtained from unlabeled yeasts were shown on the heatmaps. The columns and rows represent combinations of acyl chains.
