# Supplementary material for: Isotope Calculation Gadgets: A Series of Software for Isotope-Tracing Experiments in Garuda Platform
Source: Metabolites. 2022 Jul 14;12(7):646. doi: 10.3390/metabo12070646 (PMC9318330; doi:10.3390/metabo12070646)
Supplement: Supplementary file 1 [file metabolites-12-00646-s001.zip › File S1 Chemical_formula_SIM.csv]

Fragment_name	C_in_backbone	C_in_deriv_group	H	N	O	P	S	Si
Ala[M-57]	3	8	26	1	2	0	0	2
Asp[M-57]	4	14	40	1	4	0	0	3
Glu[M-57]	5	14	42	1	4	0	0	3
Pro[M-57]	5	8	28	1	2	0	0	2
Gly[M-57]	2	8	24	1	2	0	0	2
Ser[M-57]	3	14	40	1	3	0	0	3
3PG[M-57]	3	20	54	0	7	1	0	4
PEP[M-57]	3	14	38	0	6	1	0	3
Pyr[M-57]	3	3	12	1	3	0	0	1
Lac[M-57]	3	8	25	0	3	0	0	2
Cit[M-189]	6	14	39	0	6	0	0	3
aKG[M-57]	5	9	28	1	5	0	0	2
Suc[M-57]	4	8	25	0	4	0	0	2
Fum[M-57]	4	8	23	0	4	0	0	2
Mal[M-57]	4	14	39	0	5	0	0	3
