# Supplementary material for: Isotope Calculation Gadgets: A Series of Software for Isotope-Tracing Experiments in Garuda Platform
Source: Metabolites. 2022 Jul 14;12(7):646. doi: 10.3390/metabo12070646 (PMC9318330; doi:10.3390/metabo12070646)
Supplement: Supplementary file 1 [file metabolites-12-00646-s001.zip › File S2 Example_data_SIM.csv]

SIM_channels	HCT_12C_1	HCT_12C_2	HCT_12C_3	WiDr_12C_1	WiDr_12C_2	WiDr_12C_3	HCT_1-13C_Gluc_1	HCT_1-13C_Gluc_2	HCT_1-13C_Gluc_3	WiDr_1-13C_Gluc_1	WiDr_1-13C_Gluc_2	WiDr_1-13C_Gluc_3	HCT_U-13C_Gluc_1	HCT_U-13C_Gluc_2	HCT_U-13C_Gluc_3	WiDr_U-13C_Gluc_1	WiDr_U-13C_Gluc_2	WiDr_U-13C_Gluc_3	HCT_U-13C_GLN_1	HCT_U-13C_GLN_2	HCT_U-13C_GLN_3	WiDr_U-13C_GLN_1	WiDr_U-13C_GLN_2	WiDr_U-13C_GLN_3
Ala[M-57]_M+0	216670	202513	277577	198023	142795	340038	143724	136294	129930	180691	139257	145025	38027	34102	38218	27520	28053	31355	48310	243528	262436	300566	352003	269178
Ala[M-57]_M+1	48523	45957	63445	44512	32954	78026	127717	122262	116748	160636	120271	123950	10596	9367	10102	6999	6934	7814	11137	56540	60870	68284	79640	61972
Ala[M-57]_M+2	20119	19050	26219	18548	13753	31481	33464	31829	30818	42246	31580	31923	9679	9104	9539	7032	7804	6817	5131	25513	26901	30083	34195	27305
Ala[M-57]_M+3	4638	3420	4499	3101	2272	5001	10861	10005	10042	13741	10142	10572	257210	231785	263068	222426	243388	259151	3922	19940	20898	20026	22726	17867
Ala[M-57]_M+4	285	577	859	610	506	1009	1461	1440	1362	1967	1530	1562	48746	44499	50734	43565	46898	49730	775	3650	4196	3915	4553	3461
Ala[M-57]_M+5	0	0	0	17009	17332	19002	0	0	0	23664	21307	21730	44454	41772	44496	40962	42283	47777	0	0	0	26915	0	0
Ala[M-57]_M+6	0	0	0	3471	3217	3845	0	0	0	4254	4211	4239	7287	6425	6591	6379	7073	7445	0	0	0	4911	0	0
Asp[M-57]_M+0	218272	261164	382358	215883	158127	361674	514717	417583	452614	658308	509892	455408	487406	455527	505839	511845	573450	557370	14857	46723	49760	72829	74664	61367
Asp[M-57]_M+1	75542	92626	136048	77864	56881	127553	217152	175514	192285	273403	213559	190730	177918	168266	185682	185214	208492	202492	8531	32526	36966	41790	43055	34194
Asp[M-57]_M+2	35790	43456	63556	36624	26081	60309	100181	80739	87648	125451	97463	87308	143200	136549	151792	124611	149857	142022	19642	84263	95278	89764	91569	72877
Asp[M-57]_M+3	9112	10738	15116	8803	6528	14609	26859	21955	23694	33267	25964	23157	60197	57538	64279	59971	74678	69502	21232	89065	99051	164759	161874	131455
Asp[M-57]_M+4	2409	2602	4316	2369	1835	3592	6075	5131	5942	8101	6168	5415	23818	22049	24311	20702	28953	24554	98872	427681	474366	556294	547178	441076
Asp[M-57]_M+5	664	634	1015	950	250	822	2225	1095	954	1572	1224	1069	6340	6944	7044	7069	9519	8166	31685	136224	150015	181502	177382	142461
Asp[M-57]_M+6	0	129	268	0	0	0	0	0	0	0	0	0	1683	1652	1641	1691	2072	1853	14664	62907	69572	82371	80832	64532
Asp[M-57]_M+7	0	0	0	0	0	0	0	0	0	0	0	0	0	0	0	0	0	0	3281	13856	15486	17692	18258	12871
Glu[M-57]_M+0	740973	962648	1611238	675649	507398	1239201	2455780	2132320	2188015	1827801	1425534	1354688	2248604	2068384	2301143	1502479	1606221	1622602	13636	75609	83298	52028	57042	44493
Glu[M-57]_M+1	271205	356049	590903	248328	186236	452719	1062027	912690	945066	754149	586737	558093	843286	771532	861610	556670	597086	599945	11474	65552	73374	35445	39861	30334
Glu[M-57]_M+2	126418	163205	273567	115090	85885	210374	488552	420745	436973	348679	271515	256421	692571	646949	734939	373980	429388	418122	12203	80164	89438	46497	50797	38789
Glu[M-57]_M+3	33357	43716	72554	30787	22666	56465	145116	124740	128641	100172	78520	72538	251064	234872	267977	123194	142481	137024	55371	362605	405296	198106	216172	167242
Glu[M-57]_M+4	8260	10769	17534	7165	5820	13475	35978	30840	32258	24472	19241	17712	126548	118601	135219	53827	67684	62326	32049	208149	230299	142950	155369	121058
Glu[M-57]_M+5	1372	1820	3866	1430	1196	2332	7936	7349	6618	4594	4182	3432	43363	40123	45825	19183	24715	21840	347280	2271023	2480056	2083297	2269957	1721982
Glu[M-57]_M+6	314	342	713	238	209	402	1548	1571	1216	920	680	480	13335	12270	14601	5670	7822	6527	108566	712980	773638	653996	711839	540300
Glu[M-57]_M+7	0	0	0	0	0	0	0	0	0	0	0	0	3581	3420	3550	1340	1906	1812	51512	341592	370393	314013	341601	259135
Glu[M-57]_M+8	0	0	0	0	0	0	0	0	0	0	0	0	1800	872	964	0	0	318	11812	73619	79018	67432	73353	55646
Pro[M-57]_M+0	5651	6355	7384	48569	34825	58212	4589	3403	3105	57579	47958	47253	4235	3935	3978	52026	46461	56631	827	3197	2604	8774	9084	5967
Pro[M-57]_M+1	1605	1699	1757	12535	8434	14860	1432	1147	933	17184	14547	13775	1332	1004	1240	13269	11574	14894	621	870	1015	3039	3048	2216
Pro[M-57]_M+2	0	0	0	4827	3269	5511	1636	1402	0	6444	5219	5121	4447	2791	652	8601	8227	9454	1952	11499	12638	2160	1759	1337
Pro[M-57]_M+3	0	0	0	911	566	1013	834	594	0	1316	1196	1151	206	467	1149	2292	2123	2787	0	537	0	5832	5497	4114
Pro[M-57]_M+4	0	0	0	0	0	0	0	0	0	0	0	0	0	0	0	369	321	769	0	0	0	2075	2057	1553
Pro[M-57]_M+5	0	0	0	0	0	0	0	0	0	0	0	0	0	0	0	0	0	0	729	1526	1400	55100	51158	38892
Pro[M-57]_M+6	0	0	0	0	0	0	0	0	0	0	0	0	0	0	0	0	0	0	152	263	367	10765	9977	7716
Pro[M-57]_M+7	0	0	0	0	0	0	0	0	0	0	0	0	0	0	0	0	0	0	0	0	333	5013	4627	3719
Pro[M-57]_M+8	0	0	0	0	0	0	0	0	0	0	0	0	0	0	0	0	0	0	0	0	267	1033	750	562
Gly[M-57]_M+0	1648919	1764899	2232362	492933	355775	914218	2930321	2852939	2567313	1324161	1008990	1025995	2921031	2711591	3003393	1154549	1165754	1213234	437634	3030893	3080667	1479759	1851394	1277862
Gly[M-57]_M+1	358458	383536	485136	107635	78404	200405	639095	621403	561033	289512	221505	222517	638920	594205	658610	251893	255438	265362	95247	660275	671816	321947	403494	278443
Gly[M-57]_M+2	151636	161261	205787	45500	32645	83978	272726	265908	236356	122025	93475	94592	367498	342055	383494	112301	116716	118997	40828	280267	285718	137566	170663	118105
Gly[M-57]_M+3	25913	22561	32074	6733	6857	12605	38827	37424	34183	17395	13195	14224	60018	54955	59978	16348	17548	16899	6651	39887	40841	20035	24412	16729
Gly[M-57]_M+4	4793	4048	4917	1308	897	2829	6731	6748	6188	3551	2570	2300	15292	14606	16109	3342	3661	3500	1242	7113	7280	3703	4149	3161
Gly[M-57]_M+5	674	771	648	0	0	0	785	1520	2115	58	0	0	2290	1940	2464	0	0	0	473	1236	1124	510	533	0
Ser[M-57]_M+0	853329	966997	971811	548523	417605	908304	2847944	2789756	2336271	1835768	1397988	1408802	2520494	2278484	2383204	1614890	1495249	1679167	427547	2830284	2706635	2054853	2508326	1678874
Ser[M-57]_M+1	293572	334687	334765	189543	144236	313398	1110635	1083599	921053	648298	493228	497006	915230	828194	872352	561344	519504	585459	146666	977083	935954	709679	864457	578498
Ser[M-57]_M+2	136414	154921	155402	88113	67391	145303	500672	490043	413706	299078	228689	229362	441287	401153	421615	263756	245160	276467	68848	453938	434475	330049	402168	270162
Ser[M-57]_M+3	31368	35466	35744	20210	15377	33330	125213	122242	103998	70134	53431	53931	363519	331976	362405	81369	79217	87882	15706	104302	100619	75674	92622	61926
Ser[M-57]_M+4	7331	8419	8426	4775	3598	7871	28854	28408	24137	16398	12503	12706	106361	96829	105951	20927	20620	22861	3745	24281	23408	17946	21505	14132
Ser[M-57]_M+5	1207	1429	1415	745	701	1313	5010	4873	4151	2617	2057	2203	43249	39332	43103	5504	5702	6220	616	4089	3961	2974	3677	2466
Ser[M-57]_M+6	266	221	287	160	110	260	851	763	816	469	383	321	9665	8928	9705	1196	1211	1227	159	697	673	386	512	370
3PG[M-57]_M+0	7630	15043	21120	9358	7813	24040	16571	12782	13982	14469	12000	10879	0	0	0	0	0	0	11036	26889	28277	32001	29076	25112
3PG[M-57]_M+1	3395	6875	9628	3991	3565	11584	23975	18711	20618	20488	17521	14915	0	0	0	0	0	0	5303	12569	13633	15117	13436	11181
3PG[M-57]_M+2	1885	3701	5258	2505	2063	6171	11264	9120	9722	9984	8608	7093	651	654	732	522	642	478	2948	7028	7010	8006	7267	6360
3PG[M-57]_M+3	503	1091	1659	588	594	1904	5192	4024	4276	4476	3714	3477	35517	30475	37010	23464	31004	26351	830	2237	2017	2621	2313	1895
3PG[M-57]_M+4	215	383	556	212	170	490	1664	1396	1309	1408	1203	1016	15298	10702	15823	10315	12505	11359	442	660	753	585	833	633
3PG[M-57]_M+5	0	0	0	0	0	78	347	282	352	315	357	215	8402	6859	8447	5623	7197	6178	329	0	0	0	0	0
3PG[M-57]_M+6	0	0	0	0	0	0	0	0	0	0	0	0	2943	2311	2573	1708	2519	2129	0	0	0	0	0	0
PEP[M-57]_M+0	0	0	0	0	0	0	0	0	0	0	0	0	0	0	0	0	0	0	0	0	0	0	0	0
PEP[M-57]_M+1	0	0	0	0	0	0	0	0	0	0	0	0	0	0	0	0	0	0	0	0	0	0	0	0
PEP[M-57]_M+2	0	0	0	0	0	0	0	0	0	0	0	0	0	0	0	0	0	0	0	0	0	0	0	0
PEP[M-57]_M+3	0	0	0	0	0	0	0	0	0	0	0	0	0	0	0	0	0	0	0	0	0	0	0	0
PEP[M-57]_M+4	0	0	0	0	0	0	0	0	0	0	0	0	0	0	0	0	0	0	0	0	0	0	0	0
PEP[M-57]_M+5	0	0	0	0	0	0	0	0	0	0	0	0	0	0	0	0	0	0	0	0	0	0	0	0
PEP[M-57]_M+6	0	0	0	0	0	0	0	0	0	0	0	0	0	0	0	0	0	0	0	0	0	0	0	0
Pyr[M-57]_M+0	252334	241421	267648	119774	92665	231016	238148	259874	204912	235497	178109	193983	27262	23651	28287	36379	18814	21234	92578	411437	413498	459691	563179	404299
Pyr[M-57]_M+1	29918	27090	31720	13660	11021	28047	209537	232397	184011	198964	145027	168061	4003	3422	3721	4310	2759	1955	10888	49447	50144	56025	68457	49262
Pyr[M-57]_M+2	11532	10614	11778	5417	3788	10697	31839	34685	27635	30373	22166	25274	10438	9361	10945	7453	8180	9139	4416	20443	20231	23138	27989	20165
Pyr[M-57]_M+3	806	678	778	339	464	1253	9281	9716	7913	8648	6194	6982	414539	365763	439115	276036	339355	376807	2657	10169	10553	11645	14232	10254
Pyr[M-57]_M+4	0	0	16	0	0	0	601	897	630	585	438	395	37009	32968	39533	24735	30510	33651	422	849	1006	892	1353	971
Pyr[M-57]_M+5	0	0	0	0	0	0	0	0	0	0	0	0	17365	15346	18662	11765	14373	15884	584	701	0	792	699	810
Pyr[M-57]_M+6	0	0	0	0	0	0	0	0	0	0	0	0	745	637	953	487	722	716	0	0	0	0	0	0
Lac[M-57]_M+0	12922730	11604089	13407855	5284120	3946852	9592852	6840941	7612281	5821863	5410692	3870742	4217499	839414	724494	861169	819227	572867	694146	3805941	12707630	12544662	9292010	11995999	8835206
Lac[M-57]_M+1	2896764	2607613	3015938	1181460	886034	2147189	6417230	7673569	5754115	4749480	3423029	3724212	217545	186944	224126	190419	138457	164587	852473	2871502	2836825	2065553	2643400	1970471
Lac[M-57]_M+2	1231062	1104403	1284153	500949	377001	913406	1735421	2044463	1538884	1298390	938780	1033628	372009	319517	387621	219891	204057	235705	372725	1256292	1243963	927165	1192263	879184
Lac[M-57]_M+3	181264	165481	191027	73858	55602	136379	562187	675249	504183	411946	297840	328868	12768832	10947485	13393172	6464465	6691616	7689051	125136	420367	420064	318745	416444	298261
Lac[M-57]_M+4	35469	30797	36300	14047	10684	26784	87427	103526	77200	63890	47319	52055	2487907	2118503	2597920	1248093	1293344	1486150	26160	82326	84015	65090	83076	60226
Lac[M-57]_M+5	4381	3312	3625	1437	1589	2824	14853	17562	13309	11118	8458	8893	1157960	984288	1201439	580870	600061	686772	7592	25523	25442	20527	26500	18948
Lac[M-57]_M+6	1238	1549	4178	3901	1851	3733	2940	4357	5162	2656	952	2727	146750	127941	154283	75941	77540	87366	0	9401	7766	3519	4200	5307
Cit[M-189]_M+0	168934	181034	256612	96963	78687	188552	128690	101905	118324	136971	114516	99753	58722	54374	58412	55606	64009	56810	7301	21127	21784	24574	30648	22222
Cit[M-189]_M+1	64376	68854	97663	37979	29852	72907	121458	92485	114640	113765	95706	83694	25474	24454	25869	23068	25643	23289	6283	19614	19389	15460	18662	13448
Cit[M-189]_M+2	33741	33546	46265	19437	16124	35489	57532	44611	55955	54169	46486	40339	175701	169388	187417	103164	133257	113274	14462	42592	45527	30720	35980	28565
Cit[M-189]_M+3	9700	9020	11778	4276	3728	9068	21001	17270	20121	19599	17331	14285	66155	64144	70988	38604	48313	41818	15642	45755	46429	35588	41858	31086
Cit[M-189]_M+4	2270	2487	2885	1121	1173	2014	5720	5659	6208	4976	5117	4166	54678	53147	58108	29182	39955	33687	61320	175021	181354	119868	143657	105761
Cit[M-189]_M+5	748	727	687	0	0	0	1817	1830	1292	1579	1254	1124	22568	22469	24824	14613	20404	17039	28672	82683	85562	77547	91211	66318
Cit[M-189]_M+6	0	0	568	0	0	0	0	0	0	563	820	525	9324	9625	9895	6352	9217	7830	15451	43976	45493	36156	42705	31048
Cit[M-189]_M+7	0	0	0	0	0	0	0	0	0	0	0	0	9052	8652	8351	5559	6347	6658	4473	11840	12161	10168	12389	8347
Cit[M-189]_M+8	0	0	0	0	0	0	0	0	0	0	0	0	1949	2675	2734	1799	1868	2130	1527	3996	4059	3357	3621	2824
Cit[M-189]_M+9	0	0	0	0	0	0	0	0	0	0	0	0	806	846	1060	908	824	904	293	575	744	519	1193	456
aKG[M-57]_M+0	48075	52718	74597	27095	19394	57580	89327	76799	78619	76203	53373	56452	78103	75270	81444	45188	61587	66040	1224	5116	5515	4650	4269	3848
aKG[M-57]_M+1	12559	13828	19721	6995	5453	15080	29846	25356	25699	23684	16463	17642	20885	20095	21561	12174	15900	17203	205	3093	4441	2019	2496	1543
aKG[M-57]_M+2	4933	5588	8099	2999	2132	6517	11489	9554	9385	9543	6867	7393	18469	18376	19770	8346	12381	12745	536	3082	3673	1963	2454	1572
aKG[M-57]_M+3	985	1150	1495	553	369	909	2224	2020	2224	1982	1324	1568	4893	4948	5299	2236	3032	3112	1245	12622	13120	7810	9078	6090
aKG[M-57]_M+4	254	199	226	115	79	187	396	623	439	376	196	326	2606	2513	2816	1022	1518	1541	615	5980	6073	4815	5320	3408
aKG[M-57]_M+5	0	0	0	0	0	0	0	0	0	0	0	0	786	771	1024	345	480	677	7947	79754	80872	75990	90080	60114
aKG[M-57]_M+6	0	0	0	0	0	0	0	0	0	0	0	0	234	163	371	0	272	169	1505	16904	16888	16112	18940	12409
aKG[M-57]_M+7	0	0	0	0	0	0	0	0	0	0	0	0	0	0	0	0	0	0	952	7567	7775	7517	8729	5939
aKG[M-57]_M+8	0	0	0	0	0	0	0	0	0	0	0	0	0	0	0	0	0	0	376	1573	1275	1258	1540	929
Suc[M-57]_M+0	148812	139800	166045	85374	67208	151548	160551	147543	126569	178466	160050	128078	143899	130303	143533	163385	143783	137218	12353	32068	32699	30853	38157	28198
Suc[M-57]_M+1	29259	25025	30880	18399	14273	32438	45287	41745	37131	48944	44541	36139	35152	30694	35435	40152	33653	33512	5663	11186	12040	11109	13202	9638
Suc[M-57]_M+2	13494	11583	14879	7679	6345	13633	18046	16394	14437	19666	17682	14179	46037	40385	44827	44487	38599	39723	17734	23534	23834	18029	21048	16512
Suc[M-57]_M+3	2094	1678	1735	1244	808	2067	3550	3134	2842	3786	3660	3024	11724	10506	11712	10134	9660	8894	7382	9567	9835	8743	9665	7807
Suc[M-57]_M+4	373	329	492	304	306	539	803	1017	894	816	712	833	4964	4317	4808	4670	4367	4775	101952	127341	128257	134400	152254	120648
Suc[M-57]_M+5	0	0	0	0	0	0	0	552	0	0	0	0	1178	1259	1421	1318	995	1511	20129	25129	24863	26235	29706	24373
Suc[M-57]_M+6	0	0	0	0	0	0	0	0	0	0	0	0	0	0	0	0	0	0	5502	7254	7703	6688	7040	4900
Suc[M-57]_M+7	0	0	0	0	0	0	0	0	0	0	0	0	0	0	0	0	0	0	748	897	1483	1488	1144	1116
Fum[M-57]_M+0	81071	77143	100500	57819	45403	106450	102472	85559	87149	133625	105313	92283	92690	90524	99300	106048	112555	107539	5551	12324	12779	19065	24193	16774
Fum[M-57]_M+1	18877	18033	24145	13804	11369	27010	31212	26211	26220	40345	32034	27850	23220	22203	24321	26300	27751	26279	1916	4941	5081	6280	7915	6132
Fum[M-57]_M+2	14811	13865	19617	10904	8859	21205	25092	20302	20424	32118	25196	21897	40860	40832	45972	38248	44018	41418	9538	29517	32566	27966	34399	25075
Fum[M-57]_M+3	2068	2190	2818	2234	1479	3756	5507	4214	3723	6261	5259	4157	16242	15332	19772	20466	23974	21008	9237	30084	31431	52329	60363	45869
Fum[M-57]_M+4	1075	593	913	625	453	1427	2544	1984	1579	1470	1460	1034	5703	7323	6974	6307	7678	6768	52770	159584	167880	185821	217245	162172
Fum[M-57]_M+5	0	0	0	0	0	0	0	0	0	0	0	0	1524	1531	1420	2460	2089	1857	10359	33411	34940	39935	46304	34981
Fum[M-57]_M+6	0	0	0	0	0	0	0	0	0	0	0	0	0	819	414	0	0	0	5197	14759	14786	16433	19533	14503
Fum[M-57]_M+7	0	0	0	0	0	0	0	0	0	0	0	0	0	0	0	0	0	0	664	2086	1952	2429	2623	1934
Mal[M-57]_M+0	216688	224901	307149	156731	123490	304802	325029	269762	287525	407981	329061	282206	292264	283169	306159	321527	345225	323013	10431	25961	28676	39451	47406	36556
Mal[M-57]_M+1	75950	79155	108200	56536	43304	106945	135238	110756	121333	169231	137766	117548	106976	102457	110686	115525	124091	115716	7537	20200	20905	22578	26213	20260
Mal[M-57]_M+2	36046	37686	51821	26556	20615	51077	63067	51957	55637	78063	63541	54912	85282	82668	90233	79513	90503	81135	18326	51120	54692	48559	55956	42774
Mal[M-57]_M+3	8633	9249	12488	6674	4967	12252	17717	14583	15299	21502	17055	15250	34769	34035	37813	39428	46138	41587	19507	56005	58896	92068	101156	77670
Mal[M-57]_M+4	2199	2645	3436	1786	1525	2953	4534	3718	4250	5301	3951	3799	13485	13097	14752	14461	17853	15529	95636	273597	286629	319477	358445	267898
Mal[M-57]_M+5	480	728	617	275	230	606	689	573	833	1066	720	839	4039	4079	4479	4583	6057	5320	30050	85911	90198	102526	115094	85926
Mal[M-57]_M+6	0	0	0	0	0	0	0	0	0	0	0	0	971	1370	850	1337	2231	924	14271	40503	42843	46980	52958	39813
Mal[M-57]_M+7	0	0	0	0	0	0	0	0	0	0	0	0	0	0	0	0	0	260	1597	4522	4435	5101	5775	4082
